# Supplementary material for: Anatomy-aware and acquisition-agnostic joint registration with SynthMorph
Source: PubMed Central journal article supplement (PMC11247402; doi:10.1162/imag_a_00197), 2024-06-25
Supplement: imag_a_00197-supp.pdf [file imag_a_00197-supp.pdf]

# Supplementary material

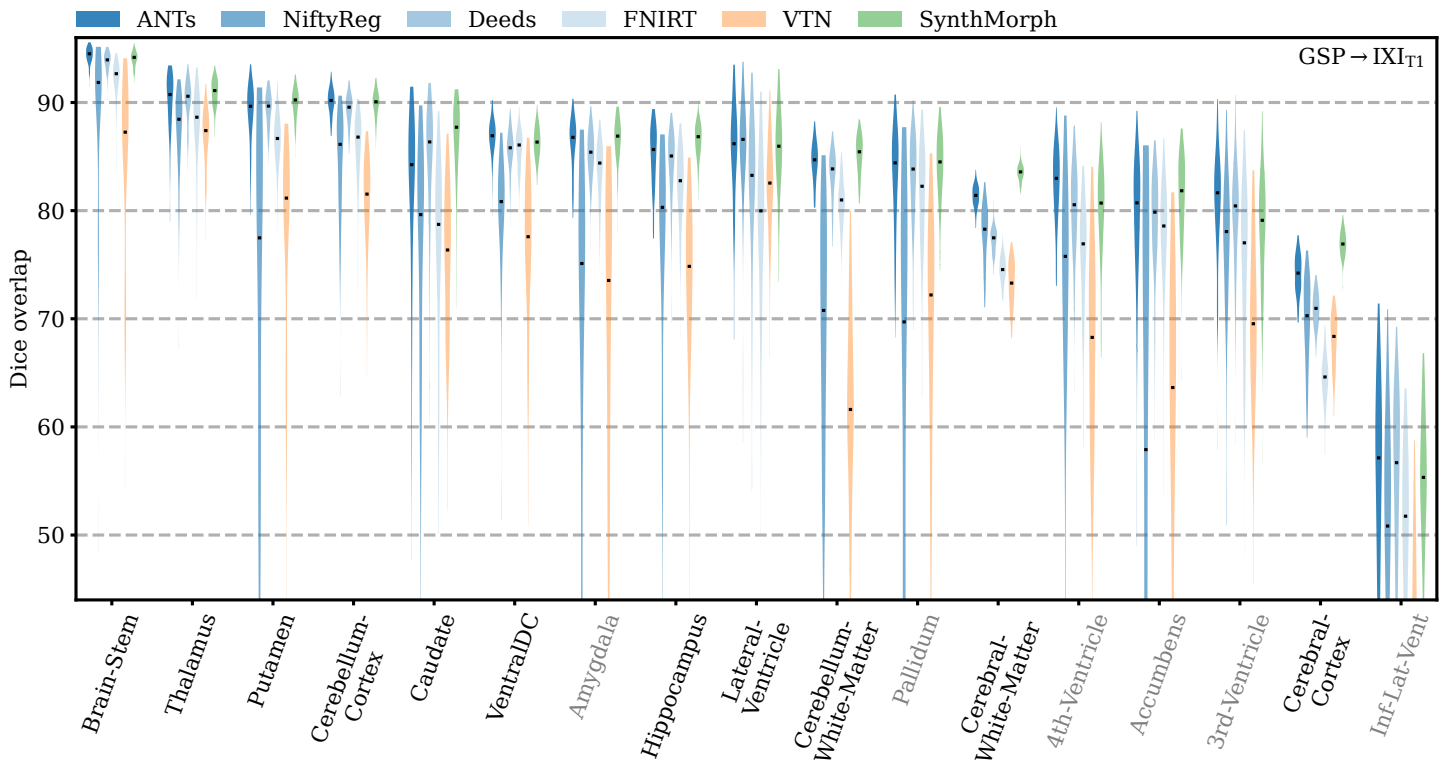

Figure S1. Deformable 3D registration accuracy per structure across testset GSP→IXI<sub>T1</sub> after affine initialization with NiftyReg. We left-right average bilateral brain regions. SynthMorph training did not optimize the overlap of structures shown in gray.

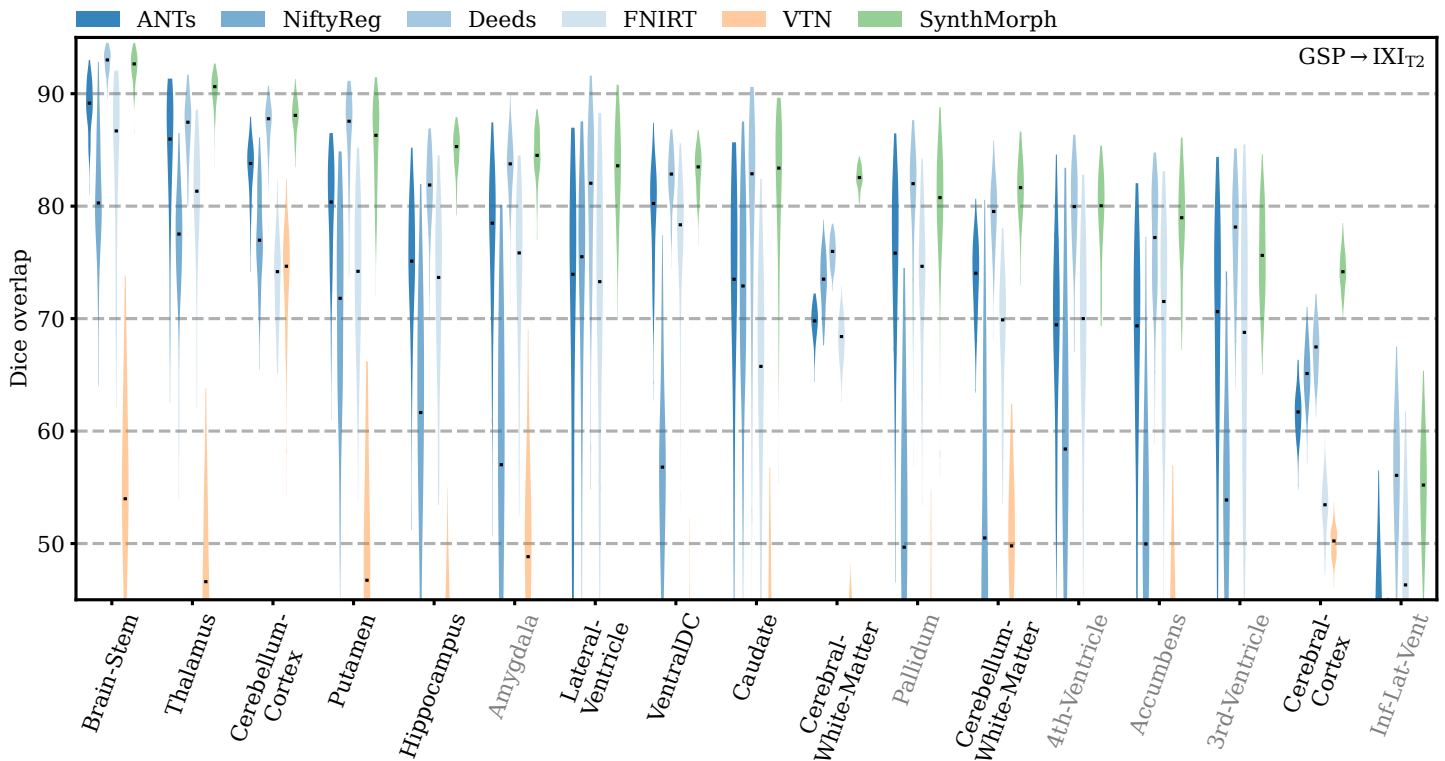

Figure S2. Deformable 3D registration accuracy per structure across testset GSP→IXI<sub>T2</sub> after affine initialization with NiftyReg. We left-right average bilateral brain regions. SynthMorph training did not optimize the overlap of structures shown in gray.

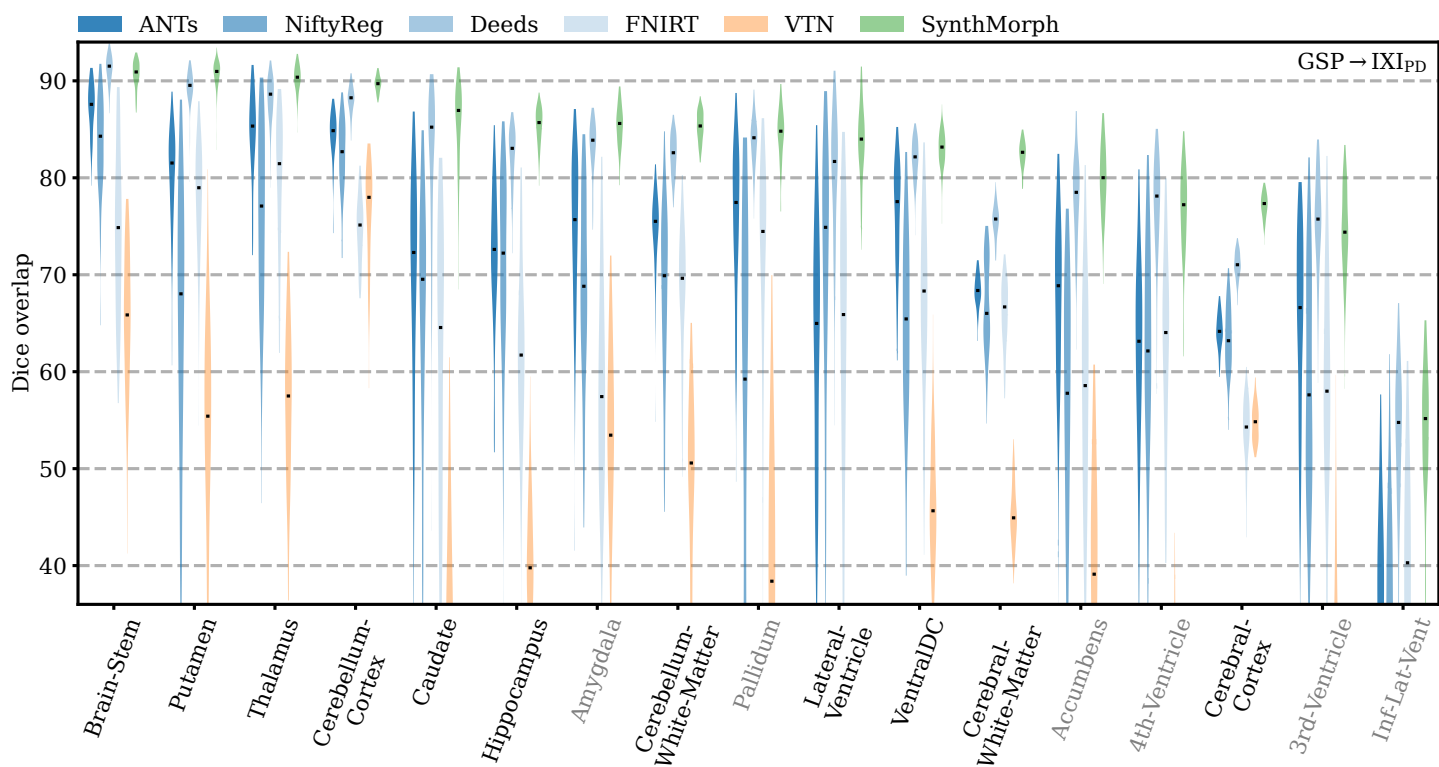

**Figure S3.** Deformable 3D registration accuracy per structure across testset GSP to IXI<sub>PD</sub> after affine initialization with NiftyReg. We left-right average bilateral brain regions. SynthMorph training did not optimize the overlap of structures shown in gray.

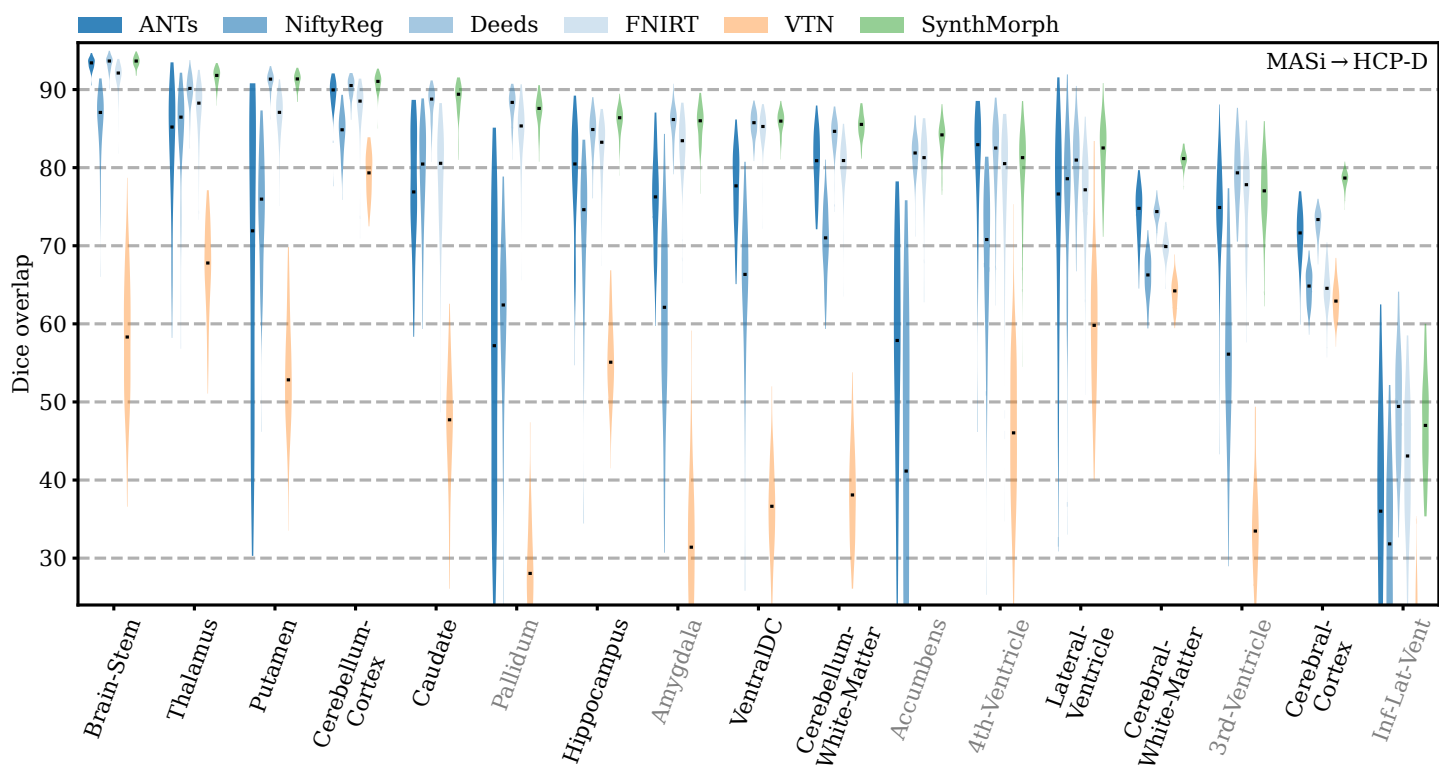

**Figure S4.** Deformable 3D registration accuracy per structure across testset MASI to HCP-D after affine initialization with NiftyReg. We left-right average bilateral brain regions. SynthMorph training did not optimize the overlap of structures shown in gray.

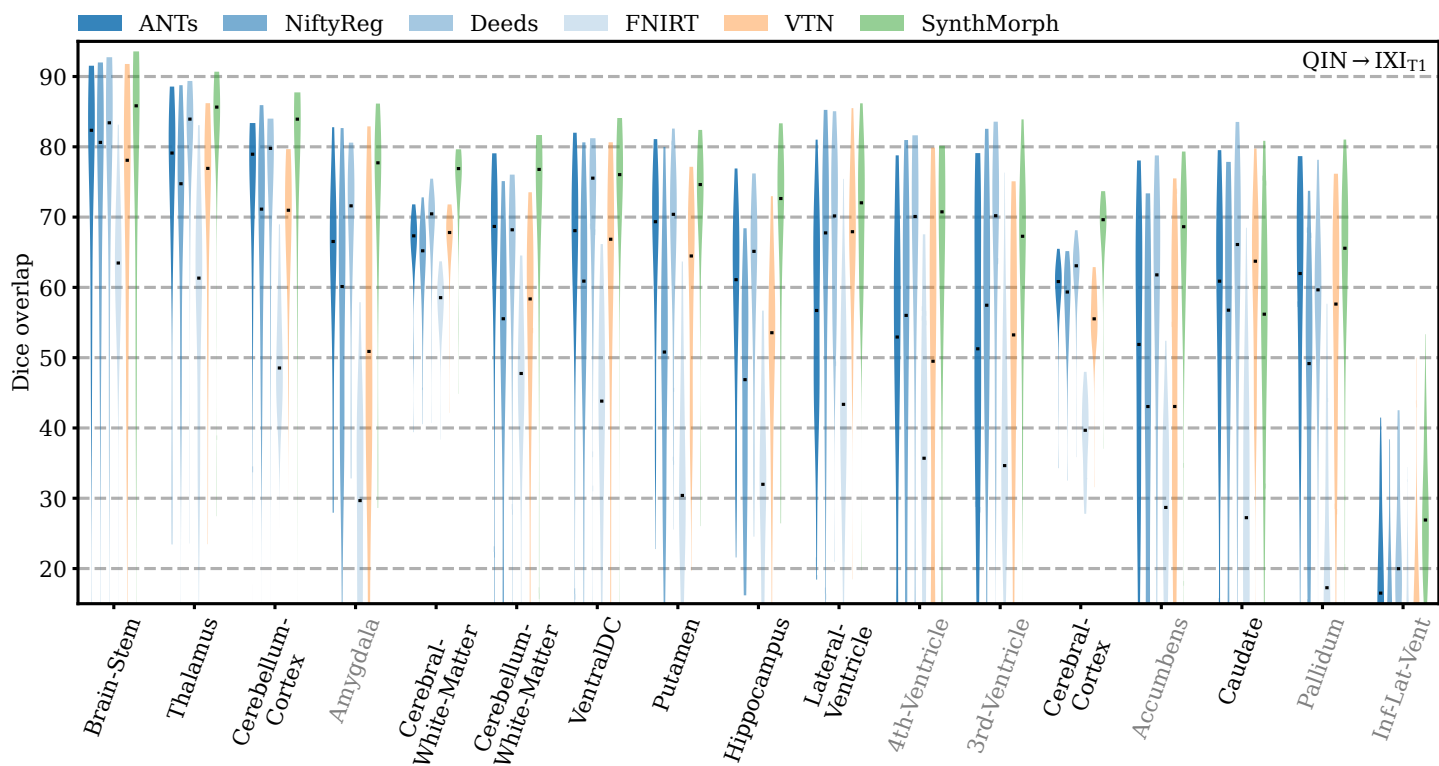

**Figure S5.** Deformable 3D registration accuracy per structure across testset QIN→IXI<sub>T1</sub> after affine initialization with NiftyReg. We left-right average bilateral brain regions. SynthMorph training did not optimize the overlap of structures shown in gray.
